# Supplementary material for: Evaluation of nutrient content of different harvest stages in switchgrass (Panicum virgatum L.) cultivars
Source: PeerJ. 2024 Nov 26;12:e18570. doi: 10.7717/peerj.18570 (PMC11606328; doi:10.7717/peerj.18570)
Supplement: Supplemental Information 5 [file peerj-12-18570-s005.xlsx]

## Sheet: jump
Year	Cultivars	Harvest stage	Replication	Calcium	Potassium	Magnesium	Phosphorus	Calcium/Phosphorus	Potassium /(Calcium+Magnesium)
2019	Kanlow	pre-flowering	1	0.5	0.47	0.17	0.2	2.5	1.42553
2019	Kanlow	pre-flowering	2	0.5	0.42	0.17	0.2	2.5	1.59524
2019	Kanlow	pre-flowering	3	0.49	0.31	0.18	0.2	2.45	2.16129
2019	Kanlow	pre-flowering	4	0.51	0.37	0.17	0.19	2.68421	1.83784
2019	Kanlow	50% flowering	1	0.48	0.45	0.18	0.21	2.28571	1.46667
2019	Kanlow	50% flowering	2	0.54	0.52	0.19	0.19	2.84211	1.40385
2019	Kanlow	50% flowering	3	0.44	0.34	0.18	0.19	2.31579	1.82353
2019	Kanlow	50% flowering	4	0.44	0.69	0.16	0.19	2.31579	0.869565
2019	Kanlow	full flowering	1	0.53	0.69	0.17	0.2	2.65	1.01449
2019	Kanlow	full flowering	2	0.42	0.66	0.16	0.2	2.1	0.878788
2019	Kanlow	full flowering	3	0.41	0.31	0.14	0.19	2.15789	1.77419
2019	Kanlow	full flowering	4	0.41	0.43	0.15	0.19	2.15789	1.30233
2019	Shelter	pre-flowering	1	0.46	1.09	0.16	0.24	1.91667	0.568807
2019	Shelter	pre-flowering	2	0.52	1.08	0.16	0.24	2.16667	0.62963
2019	Shelter	pre-flowering	3	0.54	0.84	0.15	0.23	2.34783	0.821429
2019	Shelter	pre-flowering	4	0.47	1.13	0.17	0.23	2.04348	0.566372
2019	Shelter	50% flowering	1	0.43	0.64	0.17	0.21	2.04762	0.9375
2019	Shelter	50% flowering	2	0.45	0.97	0.18	0.22	2.04545	0.649485
2019	Shelter	50% flowering	3	0.4	0.71	0.14	0.21	1.90476	0.760563
2019	Shelter	50% flowering	4	0.4	1.07	0.16	0.22	1.81818	0.523364
2019	Shelter	full flowering	1	0.55	0.45	0.17	0.2	2.75	1.6
2019	Shelter	full flowering	2	0.46	0.48	0.17	0.21	2.19048	1.3125
2019	Shelter	full flowering	3	0.61	0.45	0.17	0.2	3.05	1.73333
2019	Shelter	full flowering	4	0.57	0.42	0.18	0.2	2.85	1.78571
2019	Shawnee	pre-flowering	1	0.57	0.83	0.19	0.23	2.47826	0.915663
2019	Shawnee	pre-flowering	2	0.47	0.85	0.16	0.23	2.04348	0.741176
2019	Shawnee	pre-flowering	3	0.56	0.93	0.18	0.24	2.33333	0.795699
2019	Shawnee	pre-flowering	4	0.4	0.95	0.15	0.23	1.73913	0.578947
2019	Shawnee	50% flowering	1	0.43	0.51	0.19	0.2	2.15	1.21569
2019	Shawnee	50% flowering	2	0.51	0.67	0.17	0.2	2.55	1.01493
2019	Shawnee	50% flowering	3	0.41	0.74	0.16	0.22	1.86364	0.77027
2019	Shawnee	50% flowering	4	0.39	0.74	0.17	0.21	1.85714	0.756757
2019	Shawnee	full flowering	1	0.47	0.58	0.18	0.22	2.13636	1.12069
2019	Shawnee	full flowering	2	0.52	0.44	0.17	0.2	2.6	1.56818
2019	Shawnee	full flowering	3	0.49	0.51	0.17	0.21	2.33333	1.29412
2019	Shawnee	full flowering	4	0.5	0.5	0.18	0.2	2.5	1.36
2019	Boo Master	pre-flowering	1	0.42	1.2	0.16	0.23	1.82609	0.483333
2019	Boo Master	pre-flowering	2	0.43	0.95	0.15	0.23	1.86957	0.610526
2019	Boo Master	pre-flowering	3	0.51	0.87	0.17	0.24	2.125	0.781609
2019	Boo Master	pre-flowering	4	0.41	0.99	0.15	0.22	1.86364	0.565657
2019	Boo Master	50% flowering	1	0.49	0.64	0.17	0.21	2.33333	1.03125
2019	Boo Master	50% flowering	2	0.53	0.65	0.18	0.2	2.65	1.09231
2019	Boo Master	50% flowering	3	0.48	0.52	0.17	0.21	2.28571	1.25
2019	Boo Master	50% flowering	4	0.45	0.76	0.15	0.22	2.04545	0.789474
2019	Boo Master	full flowering	1	0.48	0.43	0.18	0.19	2.52632	1.53488
2019	Boo Master	full flowering	2	0.48	0.38	0.17	0.19	2.52632	1.71053
2019	Boo Master	full flowering	3	0.48	0.43	0.14	0.19	2.52632	1.44186
2019	Boo Master	full flowering	4	0.49	0.64	0.17	0.22	2.22727	1.03125
2019	Alamo	pre-flowering	1	0.49	0.9	0.18	0.22	2.22727	0.744444
2019	Alamo	pre-flowering	2	0.51	0.4	0.18	0.21	2.42857	1.725
2019	Alamo	pre-flowering	3	0.49	0.71	0.18	0.21	2.33333	0.943662
2019	Alamo	pre-flowering	4	0.41	0.31	0.18	0.21	1.95238	1.90323
2019	Alamo	50% flowering	1	0.56	0.35	0.19	0.2	2.8	2.14286
2019	Alamo	50% flowering	2	0.46	0.32	0.18	0.21	2.19048	2
2019	Alamo	50% flowering	3	0.6	0.28	0.2	0.19	3.15789	2.85714
2019	Alamo	50% flowering	4	0.43	0.25	0.19	0.19	2.26316	2.48
2019	Alamo	full flowering	1	0.46	0.68	0.18	0.2	2.3	0.941176
2019	Alamo	full flowering	2	0.45	0.73	0.19	0.22	2.04545	0.876712
2019	Alamo	full flowering	3	0.54	0.71	0.17	0.2	2.7	1
2019	Alamo	full flowering	4	0.47	0.58	0.19	0.19	2.47368	1.13793
2019	Trail Blazer	pre-flowering	1	0.51	0.97	0.18	0.25	2.04	0.71134
2019	Trail Blazer	pre-flowering	2	0.59	0.73	0.18	0.22	2.68182	1.05479
2019	Trail Blazer	pre-flowering	3	0.38	1.07	0.16	0.23	1.65217	0.504673
2019	Trail Blazer	pre-flowering	4	0.48	1.14	0.17	0.24	2	0.570175
2019	Trail Blazer	50% flowering	1	0.51	0.86	0.18	0.25	2.04	0.802326
2019	Trail Blazer	50% flowering	2	0.44	0.31	0.18	0.21	2.09524	2
2019	Trail Blazer	50% flowering	3	0.48	0.45	0.16	0.22	2.18182	1.42222
2019	Trail Blazer	50% flowering	4	0.44	0.85	0.17	0.21	2.09524	0.717647
2019	Trail Blazer	full flowering	1	0.59	1.08	0.19	0.24	2.45833	0.722222
2019	Trail Blazer	full flowering	2	0.52	0.24	0.18	0.2	2.6	2.91667
2019	Trail Blazer	full flowering	3	0.57	0.62	0.19	0.21	2.71429	1.22581
2019	Trail Blazer	full flowering	4	0.47	0.4	0.16	0.2	2.35	1.75
2019	Cave In Rock	pre-flowering	1	0.38	0.47	0.19	0.18	2.11111	1.21277
2019	Cave In Rock	pre-flowering	2	0.44	0.55	0.17	0.21	2.09524	1.10909
2019	Cave In Rock	pre-flowering	3	0.31	0.76	0.15	0.22	1.40909	0.605263
2019	Cave In Rock	pre-flowering	4	0.49	0.57	0.16	0.21	2.33333	1.14035
2019	Cave In Rock	50% flowering	1	0.55	0.55	0.17	0.2	2.75	1.30909
2019	Cave In Rock	50% flowering	2	0.56	0.39	0.18	0.2	2.8	1.89744
2019	Cave In Rock	50% flowering	3	0.48	0.37	0.16	0.19	2.52632	1.72973
2019	Cave In Rock	50% flowering	4	0.48	0.53	0.15	0.19	2.52632	1.18868
2019	Cave In Rock	full flowering	1	0.6	0.1	0.16	0.18	3.33333	7.6
2019	Cave In Rock	full flowering	2	0.49	0.71	0.17	0.22	2.22727	0.929577
2019	Cave In Rock	full flowering	3	0.53	0.56	0.17	0.19	2.78947	1.25
2019	Cave In Rock	full flowering	4	0.43	0.34	0.17	0.2	2.15	1.76471
2019	Long Island	pre-flowering	1	0.63	1.17	0.19	0.25	2.52	0.700855
2019	Long Island	pre-flowering	2	0.64	1.11	0.19	0.25	2.56	0.747748
2019	Long Island	pre-flowering	3	0.58	1.37	0.19	0.26	2.23077	0.562044
2019	Long Island	pre-flowering	4	0.57	0.95	0.19	0.24	2.375	0.8
2019	Long Island	50% flowering	1	0.62	0.96	0.18	0.23	2.69565	0.833333
2019	Long Island	50% flowering	2	0.54	0.97	0.2	0.24	2.25	0.762887
2019	Long Island	50% flowering	3	0.58	0.59	0.18	0.21	2.7619	1.28814
2019	Long Island	50% flowering	4	0.57	0.91	0.18	0.23	2.47826	0.824176
2019	Long Island	full flowering	1	0.56	0.88	0.2	0.22	2.54545	0.863636
2019	Long Island	full flowering	2	0.54	0.73	0.19	0.21	2.57143	1
2019	Long Island	full flowering	3	0.53	0.92	0.18	0.22	2.40909	0.771739
2019	Long Island	full flowering	4	0.59	0.43	0.17	0.2	2.95	1.76744
2020	Kanlow	pre-flowering	1	0.46	1.02	0.15	0.21	2.19048	0.598039
2020	Kanlow	pre-flowering	2	0.52	1.11	0.16	0.2	2.6	0.612613
2020	Kanlow	pre-flowering	3	0.56	1.14	0.16	0.21	2.66667	0.631579
2020	Kanlow	pre-flowering	4	0.58	0.95	0.18	0.2	2.9	0.8
2020	Kanlow	50% flowering	1	0.56	1.12	0.19	0.22	2.54545	0.669643
2020	Kanlow	50% flowering	2	0.58	0.89	0.18	0.19	3.05263	0.853933
2020	Kanlow	50% flowering	3	0.46	0.66	0.15	0.2	2.3	0.924242
2020	Kanlow	50% flowering	4	0.47	0.78	0.18	0.2	2.35	0.833333
2020	Kanlow	full flowering	1	0.63	0.76	0.19	0.2	3.15	1.07895
2020	Kanlow	full flowering	2	0.52	0.68	0.16	0.19	2.73684	1
2020	Kanlow	full flowering	3	0.49	0.48	0.16	0.18	2.72222	1.35417
2020	Kanlow	full flowering	4	0.51	1.23	0.17	0.22	2.31818	0.552846
2020	Shelter	pre-flowering	1	0.38	1.89	0.15	0.24	1.58333	0.280423
2020	Shelter	pre-flowering	2	0.46	1.25	0.18	0.24	1.91667	0.512
2020	Shelter	pre-flowering	3	0.54	1.41	0.2	0.22	2.45455	0.524823
2020	Shelter	pre-flowering	4	0.48	1.38	0.16	0.21	2.28571	0.463768
2020	Shelter	50% flowering	1	0.55	1.16	0.2	0.22	2.5	0.646552
2020	Shelter	50% flowering	2	0.53	1.28	0.18	0.23	2.30435	0.554688
2020	Shelter	50% flowering	3	0.52	1.31	0.19	0.24	2.16667	0.541985
2020	Shelter	50% flowering	4	0.52	1.35	0.19	0.25	2.08	0.525926
2020	Shelter	full flowering	1	0.52	0.81	0.18	0.2	2.6	0.864198
2020	Shelter	full flowering	2	0.57	0.95	0.18	0.21	2.71429	0.789474
2020	Shelter	full flowering	3	0.7	0.69	0.2	0.19	3.68421	1.30435
2020	Shelter	full flowering	4	0.58	0.96	0.2	0.21	2.7619	0.8125
2020	Shawnee	pre-flowering	1	0.52	1.49	0.2	0.24	2.16667	0.483221
2020	Shawnee	pre-flowering	2	0.41	1.42	0.16	0.24	1.70833	0.401408
2020	Shawnee	pre-flowering	3	0.45	1.21	0.18	0.22	2.04545	0.520661
2020	Shawnee	pre-flowering	4	0.44	1.28	0.18	0.22	2	0.484375
2020	Shawnee	50% flowering	1	0.59	1.18	0.2	0.22	2.68182	0.669492
2020	Shawnee	50% flowering	2	0.59	1.22	0.21	0.22	2.68182	0.655738
2020	Shawnee	50% flowering	3	0.43	1.1	0.18	0.22	1.95455	0.554545
2020	Shawnee	50% flowering	4	0.51	1.41	0.19	0.24	2.125	0.496454
2020	Shawnee	full flowering	1	0.63	0.88	0.21	0.19	3.31579	0.954545
2020	Shawnee	full flowering	2	0.62	0.83	0.2	0.2	3.1	0.987952
2020	Shawnee	full flowering	3	0.51	0.86	0.19	0.2	2.55	0.813953
2020	Shawnee	full flowering	4	0.67	1.13	0.21	0.21	3.19048	0.778761
2020	Boo Master	pre-flowering	1	0.53	1.34	0.19	0.23	2.30435	0.537313
2020	Boo Master	pre-flowering	2	0.65	1.01	0.19	0.2	3.25	0.831683
2020	Boo Master	pre-flowering	3	0.53	0.97	0.16	0.2	2.65	0.71134
2020	Boo Master	pre-flowering	4	0.53	1.33	0.18	0.23	2.30435	0.533835
2020	Boo Master	50% flowering	1	0.48	1.24	0.19	0.22	2.18182	0.540323
2020	Boo Master	50% flowering	2	0.58	0.94	0.18	0.2	2.9	0.808511
2020	Boo Master	50% flowering	3	0.56	1.02	0.2	0.2	2.8	0.745098
2020	Boo Master	50% flowering	4	0.53	1.01	0.18	0.22	2.40909	0.70297
2020	Boo Master	full flowering	1	0.61	0.93	0.24	0.21	2.90476	0.913978
2020	Boo Master	full flowering	2	0.58	0.64	0.17	0.18	3.22222	1.17188
2020	Boo Master	full flowering	3	0.48	0.71	0.17	0.2	2.4	0.915493
2020	Boo Master	full flowering	4	0.53	0.83	0.18	0.2	2.65	0.855422
2020	Alamo	pre-flowering	1	0.52	0.83	0.19	0.2	2.6	0.855422
2020	Alamo	pre-flowering	2	0.56	0.99	0.22	0.2	2.8	0.787879
2020	Alamo	pre-flowering	3	0.56	0.84	0.2	0.21	2.66667	0.904762
2020	Alamo	pre-flowering	4	0.57	1.09	0.2	0.21	2.71429	0.706422
2020	Alamo	50% flowering	1	0.49	0.98	0.22	0.23	2.13043	0.72449
2020	Alamo	50% flowering	2	0.49	0.94	0.21	0.2	2.45	0.744681
2020	Alamo	50% flowering	3	0.51	0.81	0.17	0.18	2.83333	0.839506
2020	Alamo	50% flowering	4	0.51	0.96	0.2	0.2	2.55	0.739583
2020	Alamo	full flowering	1	0.65	0.85	0.22	0.19	3.42105	1.02353
2020	Alamo	full flowering	2	0.55	0.46	0.21	0.18	3.05556	1.65217
2020	Alamo	full flowering	3	0.56	0.77	0.17	0.2	2.8	0.948052
2020	Alamo	full flowering	4	0.54	0.83	0.22	0.19	2.84211	0.915663
2020	Trail Blazer	pre-flowering	1	0.5	1.35	0.21	0.23	2.17391	0.525926
2020	Trail Blazer	pre-flowering	2	0.51	1.04	0.17	0.21	2.42857	0.653846
2020	Trail Blazer	pre-flowering	3	0.49	1.34	0.18	0.24	2.04167	0.5
2020	Trail Blazer	pre-flowering	4	0.45	1.54	0.16	0.24	1.875	0.396104
2020	Trail Blazer	50% flowering	1	0.55	1.15	0.19	0.21	2.61905	0.643478
2020	Trail Blazer	50% flowering	2	0.51	0.8	0.17	0.19	2.68421	0.85
2020	Trail Blazer	50% flowering	3	0.48	0.71	0.18	0.19	2.52632	0.929577
2020	Trail Blazer	50% flowering	4	0.52	1.06	0.18	0.2	2.6	0.660377
2020	Trail Blazer	full flowering	1	0.6	0.65	0.18	0.2	3	1.2
2020	Trail Blazer	full flowering	2	0.46	0.68	0.19	0.17	2.70588	0.955882
2020	Trail Blazer	full flowering	3	0.53	0.73	0.18	0.19	2.78947	0.972603
2020	Trail Blazer	full flowering	4	0.52	0.87	0.17	0.19	2.73684	0.793103
2020	Cave In Rock	pre-flowering	1	0.41	1.29	0.18	0.24	1.70833	0.457364
2020	Cave In Rock	pre-flowering	2	0.49	0.99	0.18	0.21	2.33333	0.676768
2020	Cave In Rock	pre-flowering	3	0.39	1.15	0.17	0.22	1.77273	0.486957
2020	Cave In Rock	pre-flowering	4	0.34	1.4	0.16	0.23	1.47826	0.357143
2020	Cave In Rock	50% flowering	1	0.5	1.28	0.19	0.22	2.27273	0.539062
2020	Cave In Rock	50% flowering	2	0.5	1.02	0.19	0.21	2.38095	0.676471
2020	Cave In Rock	50% flowering	3	0.44	1	0.17	0.2	2.2	0.61
2020	Cave In Rock	50% flowering	4	0.62	1.35	0.19	0.26	2.38462	0.6
2020	Cave In Rock	full flowering	1	0.51	0.75	0.2	0.2	2.55	0.946667
2020	Cave In Rock	full flowering	2	0.55	0.74	0.2	0.19	2.89474	1.01351
2020	Cave In Rock	full flowering	3	0.57	0.91	0.18	0.19	3	0.824176
2020	Cave In Rock	full flowering	4	0.57	1.06	0.2	0.21	2.71429	0.726415
2020	Long Island	pre-flowering	1	0.5	1.37	0.21	0.23	2.17391	0.518248
2020	Long Island	pre-flowering	2	0.57	1.31	0.22	0.22	2.59091	0.603053
2020	Long Island	pre-flowering	3	0.54	1.29	0.23	0.22	2.45455	0.596899
2020	Long Island	pre-flowering	4	0.59	1.44	0.22	0.23	2.56522	0.5625
2020	Long Island	50% flowering	1	0.58	1.25	0.21	0.24	2.41667	0.632
2020	Long Island	50% flowering	2	0.58	1.31	0.21	0.23	2.52174	0.603053
2020	Long Island	50% flowering	3	0.6	1.2	0.21	0.21	2.85714	0.675
2020	Long Island	50% flowering	4	0.58	1.43	0.22	0.25	2.32	0.559441
2020	Long Island	full flowering	1	0.61	0.9	0.2	0.19	3.21053	0.9
2020	Long Island	full flowering	2	0.56	0.89	0.21	0.19	2.94737	0.865169
2020	Long Island	full flowering	3	0.67	0.89	0.22	0.19	3.52632	1
2020	Long Island	full flowering	4	0.61	0.9	0.23	0.2	3.05	0.933333
